# Supplementary material for: Postoperative Probiotics Administration Attenuates Gastrointestinal Complications and Gut Microbiota Dysbiosis Caused by Chemotherapy in Colorectal Cancer Patients
Source: Nutrients. 2023 Jan 11;15(2):356. doi: 10.3390/nu15020356 (PMC9861237; doi:10.3390/nu15020356)
Supplement: Supplementary file 1 [file nutrients-15-00356-s001.zip › Table S1-CRC-Li et al-202211.xlsx]

## Sheet: Table S1
	Table S1. Compative anaylsis of blood routine test between placebo and probiotics groups
	Types a	Preoperation		p value b	Postoperation		p value b	Prechemotherapy		p value b	Postchemotherapy		p value b
		Placebo	Probio		Placebo	Probio		Placebo	Probio		Placebo	Probiot
	WBC	6.49±2.10	6.77±2.14	0.5087	8.87±3.04	7.42±2.68	0.0127	5.61±1.52	5.76±1.59	0.6582	5.19±1.47	5.43±1.44	0.4432
	RBC	4.47±0.56	4.41±0.64	0.6345	4.01±0.48	3.95±0.59	0.5384	4.18±0.56	4.20±0.50	0.8613	4.10±0.45	4.14±0.54	0.7146
	HGB	126.70±23.23	122.42±24.58	0.3653	111.28±17.30	111.14±16.94	0.9675	123.10±17.87	123.60±17.27	0.9087	120.68±16.14	119.90±15.37	0.8237
	PLT	259.14±70.46	267.82±91.80	0.6859	239.64±93.80	256.38±88.65	0.3613	206.50±55.97	204.80±53.16	0.8866	204.49±86.05	210.20±59.37	0.7285
	NEUT (%)	66.20±8.75	65.23±8.52	0.5741	75.97±6.73	72.44±6.71	0.0099	58.40±9.64	59.99±10.14	0.4633	58.05±10.03	56.38±10.56	0.4693
	LYM (%)	24.57±7.85	25.18±7.84	0.6983	17.89±30.62	16.52±5.33	0.7565	31.33±8.71	28.59±9.01	0.1603	30.36±9.21	32.46±9.15	0.3049
	Mono (%)	6.97±2.22	7.30±2.52	0.4809	8.04±8.04	9.29±11.63	0.5348	9.43±10.89	8.74±2.37	0.692	8.60±2.63	8.06±2.47	0.3511
	NEUT #	5.15±5.68	4.51±1.92	0.453	6.80±2.58	5.46±2.29	0.0072	3.31±1.18	3.55±1.42	0.4086	3.10±1.29	3.11±1.13	0.9865
	LYM #	1.50±0.43	2.00±2.89	0.2282	1.16±0.52	1.16±0.39	0.952	1.72±0.60	1.83±1.68	0.6946	1.51±0.45	1.66±0.53	0.1691
	Mono #	0.45±0.19	0.49±0.21	0.3407	0.62±0.32	0.57±0.28	0.4436	0.43±0.20	0.49±0.14	0.1649	0.44±0.15	0.44±0.14	0.9721
	TP	72.38±5.70	69.81±5.60	0.0255	58.78±6.54	61.14±6.08	0.0648	71.59±5.71	71.74±5.41	0.9041	73.21±6.56	71.37±4.79	0.1568
	ALB	43.55±3.60	41.94±4.42	0.0496	33.64±3.39	35.13±3.87	0.0427	42.75±4.14	42.98±4.11	0.8016	43.17±3.86	42.07±3.10	0.166
	GLB	28.83±5.42	27.87±4.18	0.3278	25.15±5.18	26.01±4.05	0.3564	28.85±4.90	28.04±6.90	0.5296	30.09±6.06	29.26±4.97	0.5077
	A/G	1.57±0.36	1.54±0.30	0.6702	1.39±0.30	1.36±0.29	0.6101	1.52±0.29	1.55±0.34	0.7654	1.50±0.35	1.48±0.28	0.8269
	TBIL	12.82±4.93	12.91±5.33	0.9898	16.15±7.79	14.18±6.38	0.1689	13.67±5.83	14.12±4.37	0.6967	13.47±3.80	14.77±14.90	0.6
	DBIL	2.69±1.14	2.65±1.36	0.8496	4.14±3.16	3.64±4.02	0.4931	2.74±1.27	3.11±1.42	0.2215	2.72±0.90	3.79±8.99	0.4585
	IBIL	10.28±4.25	10.16±4.31	0.8943	12.02±5.50	10.54±3.92	0.1257	10.93±4.81	11.01±3.69	0.9322	10.75±3.58	10.90±6.27	0.894
	AST	21.24±5.12	21.82±11.60	0.7505	29.38±20.80	34.59±22.93	0.237	27.42±10.63	25.97±11.23	0.5566	25.70±7.39	46.55±78.18	0.101
	ALT	26.22±8.05	17.04±12.15	0.6934	24.14±19.55	32.87±29.36	0.0839	22.43±12.65	21.75±13.09	0.814	20.28±12.57	30.31±62.82	0.3277
	ALP	85.03±20.72	87.72±22.41	0.5338	93.56±52.84	100.03±56.83	0.5574	93.82±28.25	85.80±18.31	0.1418	88.06±22.09	100.19±43.17	0.1226
	K c	3.96±0.41	3.88±0.38	0.3073	4.18±0.50	4.14±0.43	0.6658	5.48±7.86	4.03±0.35	0.3523	4.04±0.39	3.93±0.32	0.2679
	Na c	139.46±2.66	138.49±7.61	0.3981	137.42±3.51	137.23±2.84	0.7656	139.80±2.23	138.9±2.34	0.1808	139.41±2.85	139.98±2.09	0.3582
	Cl c	103.64±3.47	112.32±61.32	0.323	103.53±4.53	102.68±3.51	0.2987	104.90±3.22	104.00±2.71	0.3065	104.17±2.85	103.72±2.67	0.5284
	Ca c	2.36±0.11	2.40±0.38	0.5287	2.24±0.13	2.27±0.12	0.1774	2.39±0.10	2.38±0.10	0.5604	2.40±0.11	2.40±0.09	0.9412
	Urea	4.81±1.09	7.89±19.38	0.2717	6.78±2.14	7.93±15.52	0.7602	5.18±1.32	5.42±1.23	0.552	5.21±1.58	4.90±1.45	0.4365
	Cre	72.15±20.95	72.31±19.11	0.9687	64.53±23.75	57.61±15.13	0.3134	68.09±18.06	76.94±20.88	0.144	72.77±24.36	67.01±18.31	0.3159
	URIC	331.48±99.93	320.10±105.20	0.5684	155.16±65.87	173.82±78.52	0.4615	325.10±72.96	324.10±82.51	0.9676	327.84±99.60	311.54±85.36	0.5092
	a Abbreviations: WBC, white blood cell count (109 cells/L); RBC, red blood cell count (1012 cells/L); HGB, hemoglobin content (g/L); PLT, platelet count (109 /L); NEUT %, percentage of neutrophils; LYM %, percentage of lymphocytes; Mono %, percentage of monocytes; NEUT #, absolute value of neutrophils; LYM #, absolute value of lymphocytes; Mono #, absolute value of monocytes; CRP, C-reactive prot…
	b Unpaired t test between placebo and probiotics groups.
	c Units of measurement: mmol/L.
